# Supplementary material for: Synthesis mechanism of grain-oriented lead-free piezoelectric Na0.5Bi0.5TiO3–BaTiO3 ceramics with giant piezoelectric response
Source: Royal Society of Chemistry journal article supplement (doi:10.1039/c3tc00619k), 2013-01-01
Supplement: c3tc00619k.pdf [file c3tc00619k.pdf]

**Supplementary data:**

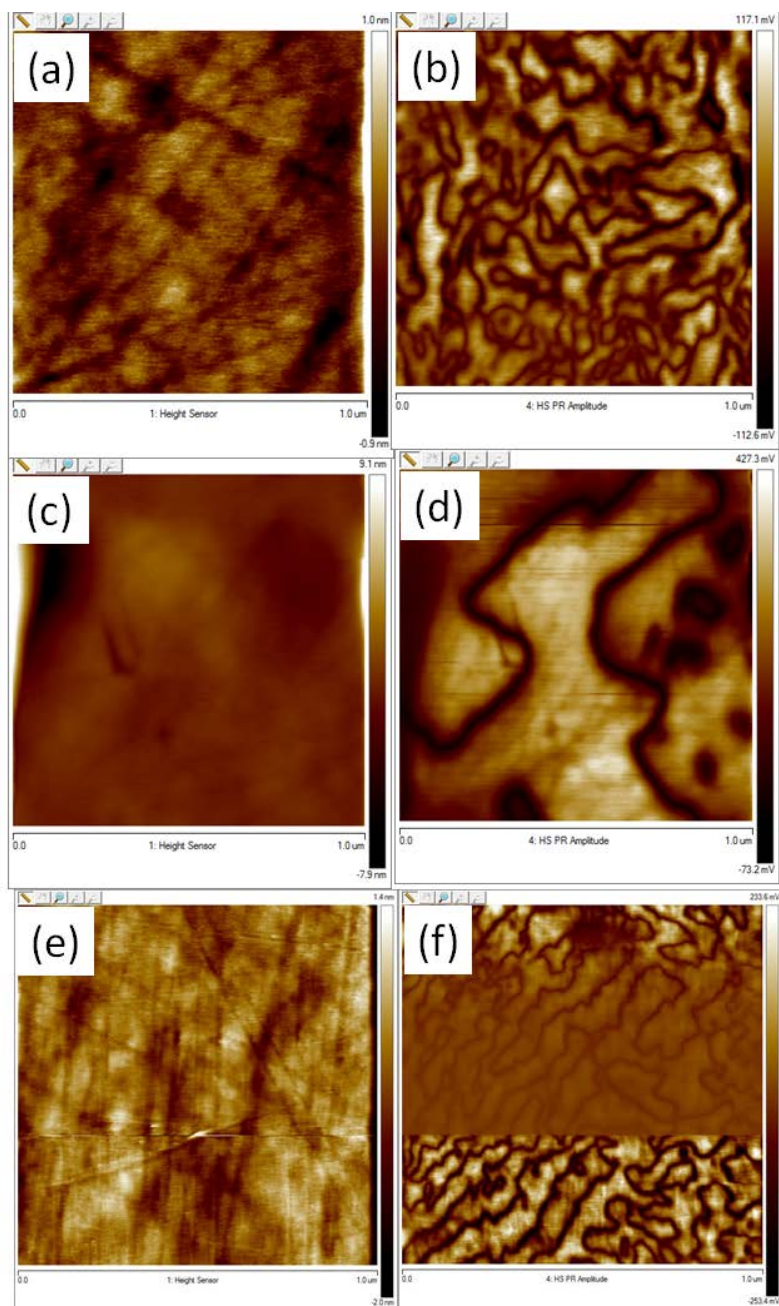

**Figure S-1** (a)-(b), (c)-(d) and (e)- (f) Height and amplitude PFM images corresponding to the phase image showing domain structure in figure 6(e), inset of figure 6(e), and figure 6(f), respectively.
